# Supplementary material for: Discovery of new acetylcholinesterase and butyrylcholinesterase inhibitors through structure-based virtual screening
Source: Royal Society of Chemistry journal article supplement (doi:10.1039/c6ra25887e), 2017-01-01
Supplement: c6ra25887e1.pdf [file c6ra25887e1.pdf]

## Discovery of New Acetyl- and Butyrylcholinesterase Inhibitors through Structure-Based Virtual Screening

Yao Chen <sup>a</sup>, Hongzhi Lin <sup>b</sup>, Hongyu Yang <sup>b</sup>, Renxiang Tan <sup>a</sup>, Yaoyao Bian <sup>a</sup>, Tingming Fu <sup>a</sup>, Wei Li <sup>a</sup>, Liang Wu <sup>a</sup>, Yuqiong Pei <sup>a,\*</sup>, Haopeng Sun <sup>b,\*</sup>

<sup>a</sup>School of Pharmacy, Nanjing University of Chinese Medicine, Nanjing, 210023, China;

<sup>b</sup>Department of Medicinal Chemistry, China Pharmaceutical University, Nanjing, 210009, China;

Supporting information

**Table S1.** The SMILES format of all the 24 potential hits, and they were validated by Pan Assay Interference Compounds (PAINS) filter.

| Chemdiv ID | SMILES string                                                                                    | PAINS filter |
|------------|--------------------------------------------------------------------------------------------------|--------------|
| C749-0087  | <chem>CO/C1=C/C=C(C=C1)C=2N=C(ON=2)N3CCN(CC3)C/C5=C/C=C4OCOC4=C5</chem>                          | pass         |
| 8003-0197  | <chem>C/C1=C/C(=NN1CC(=O)N3CCN(C/C2=C/C=CC=C2)CC3)[N+](=O)[O-]</chem>                            | pass         |
| C611-0434  | <chem>CO/C5=C/C=C(/NC(=O)C=3[S]C2=NC=1CCN(CC=1C=C2C=3N)C/C4=C/C=CC=C4)C(=C5)OC</chem>            | pass         |
| C629-0196  | <chem>CC=2N=C1C=CC=CC1=C3OC(=CC=23)C(=O)NC4([H])CN(CC4)C/C5=C/C=CC=C5</chem>                     | pass         |
| C437-0121  | <chem>[O-]/[N+]3=C(\NC1([H])CCN(CC1)C/C2=C/C=CC=C2)C(=NN3/C5=C/C=C4OCCOC4=C5)[N+](=O)[O-]</chem> | pass         |
| 4964-1479  | <chem>CO/C1=C/C=C(C=C1)OCC(=O)N3CCN(C/C2=C/C=CC([F])=C2)CC3</chem>                               | pass         |
| 5905-2743  | <chem>CO/C1=C/C=C(/C=C1/OC)NC(=O)C2=CC=C(C=C2)CN4CC3=CC=CC=C3CC4</chem>                          | pass         |
| C590-0093  | <chem>C/C1=C/C=C(C=C1)C=2C=C(NN=2)C(=O)N4CCN(C/C3=C/C=CC=C3)CC4</chem>                           | pass         |
| K284-5464  | <chem>CO/C1=C/C4=C(/C=C1/OC)N=C([S]CC(=O)NCC/C2=C/C=CC=C2)N(C/C3=C/C=CO3)C4=O</chem>             | pass         |

|                  |                                                                                        |      |
|------------------|----------------------------------------------------------------------------------------|------|
| <b>6048-0476</b> | <chem>O=C(/C2=C/C(=NC1=CC=CC=C12)C4=CC=C3OCOC3=C4)N7CCN(C/C6=C/C=C5OCOC5=C6)CC7</chem> | pass |
| <b>G070-1566</b> | <chem>CN1C=C(/C=C1/C(=O)OC)[S](=O)(=O)NCC2([H])CCN(C2)C/C3=C/C=C/C3/[F]</chem>         | pass |
| <b>G421-0271</b> | <chem>CO/C1=C/C(=CC(=C1)OC)N/C3=N/C=C2CN(CCC2=N3)C/C4=C/C=CC([F])=C4</chem>            | pass |
| <b>G900-0252</b> | <chem>O=C(NCC1([H])CCN(CC1)C/C2=C/C=CC([Cl])=C2)C4=C=C3C=C/C=C(/O)C3=N4</chem>         | pass |
| <b>D305-0628</b> | <chem>CC(=O)N1CCN(CC1)C/C3=N/C2=CC(=CC=C2N3CC)NC(=O)C4=C/C=C(/OC)C(=C4)OC</chem>       | pass |
| <b>F687-0560</b> | <chem>COCC(=O)N/C1=C/C=C(/C=C1/C(=O)O)N2CCN(CC2)C/C3=C/C=C/C3/[F]</chem>               | pass |
| <b>D434-0535</b> | <chem>CN(C)[S](=O)(=O)C1=CC=C(C=C1)C2=NC(C#N)=C(O2)N3CCN(CC3)C/C4=C/C=CC=C4</chem>     | pass |
| <b>G115-0283</b> | <chem>C/C1=C/C=C/C=C1/CN2CCC([H])(CC2)CN[S](=O)(=O)C4=CC=C3NC(=O)CCCC3=C4</chem>       | pass |
| <b>G801-0274</b> | <chem>CN2C1=CC=C(C=C1N(C)C2=O)[S](=O)(=O)NCC3([H])CCN(CC3)C/C4=C/C=C(/[F])C=C4</chem>  | pass |
| <b>F048-0694</b> | <chem>O=C(N/C2=N/C=1CCN(CC=1[S]2)C/C3=C/C=CC=C3)C5=CC=C4OCCOC4=C5</chem>               | pass |
| <b>C599-1080</b> | <chem>CO/C1=C/C=C(/C=C1/OC)C=4/N=C(/CN2CCN(CC2)C3=CC=C(C=C3)[N+](=O)[O-])ON=4</chem>   | fail |
| <b>C590-0150</b> | <chem>CO/C1=C/C=C(C=C1)C=2C=C(NN=2)C(=O)N4CCN(C/C3=C/C=C(/[F])C=C3)CC4</chem>          | pass |
| <b>S211-1317</b> | <chem>[H]C2(CCN(C/C1=C/C=CN1)CC2)OC/C3=N/C(=NO3)C4=CN=CC=N4</chem>                     | pass |
| <b>S211-1044</b> | <chem>COCCC=3/N=C(/COC2([H])CCN(C/C1=C/C=CO1)CC2)ON=3</chem>                           | pass |
| <b>P867-0190</b> | <chem>O/C1=C/C=C(/[Br])C=C1CN2CCN(CC2)C3=CC(=NN3)C4=CC=NC=C4</chem>                    | fail |

Table S2. The predicted CLogP and Binding energy of all the 5 validated hits.

| Chemdiv ID       | ChEs inhibition IC <sub>50</sub> (μM) |               | CLogP <sup>a</sup> | Binding energy (kcal/mol) <sup>b</sup> |       |
|------------------|---------------------------------------|---------------|--------------------|----------------------------------------|-------|
|                  | AChE                                  | BuChE         |                    | AChE                                   | BuChE |
| <b>C629-0196</b> | 1.28 ± 0.83                           | nd            | 4.21               | 47.78                                  | -     |
| <b>G070-1566</b> | 2.10 ± 0.40                           | 0.78 ± 0.14   | 3.29               | 46.33                                  | 49.98 |
| <b>G115-0283</b> | 6.61 ± 2.73                           | 5.11 ± 4.21   | 3.72               | 49.19                                  | 44.11 |
| <b>G801-0274</b> | 2.05 ± 0.11                           | 0.031 ± 0.006 | 3.00               | 54.51                                  | 53.96 |
| <b>F048-0694</b> | 3.78 ± 0.32                           | 2.03 ± 0.35   | 3.77               | 46.07                                  | 40.82 |
| <b>donepezil</b> | 0.008 ± 0.001                         | nd            | 4.60               | -                                      | -     |

<sup>a</sup> CLogP is predicted by ChemDraw package 13.0.

<sup>b</sup> Binding energy is predicted by CDOCKER module in BioVIA Discovery Studio

package.
